# Supplementary material
Source: Springer Nature journal article supplement (https://www.springermedizin.de/resource/supplementary/13075_2010_3146_MOESM2_ESM.pdf/9693786)

### Depressed Mood

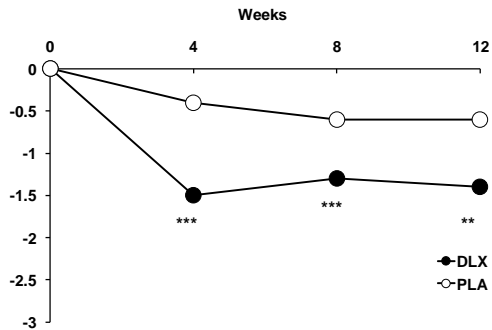

### Anxiety

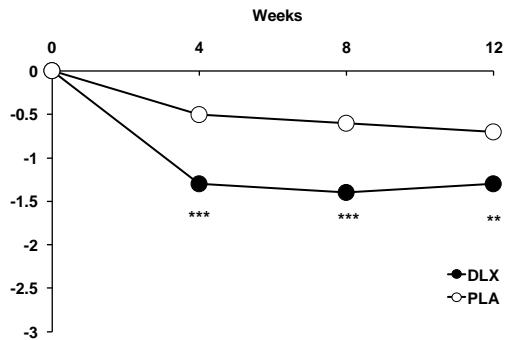

### Bothered by Sleep Difficulties

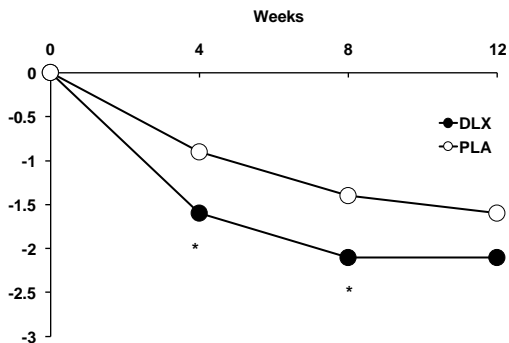

### Musculoskeletal Stiffness

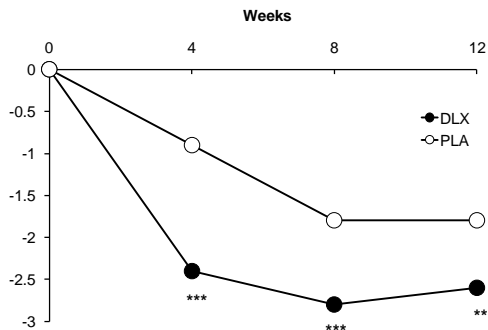

Supplement: MOESM2 [file 9693786]
